# Supplementary material for: Uptake of exogenous serine is important to maintain sphingolipid homeostasis in Saccharomyces cerevisiae
Source: PLoS Genet. 2020 Aug 26;16(8):e1008745. doi: 10.1371/journal.pgen.1008745 (PMC7478846; doi:10.1371/journal.pgen.1008745)
Supplement: S6 Data — (XLSX) [file pgen.1008745.s013.xlsx]

## Sheet: Tabelle 1
		in nmol/10^8 cells
				Ser	Gly	Lys
SD_WT_os_01				3.95545	1.10959	74.679
SD_WT_os_02				2.39668	0.584857	83.6763
SD_WT_os_03				3.48435	1.5403	89.2112
SD_WT_ms_01				5.85144	2.0977	88.178
SD_WT_ms_02				6.00882	2.77683	77.8665
SD_WT_ms_03				5.51181	2.23268	84.7749
SD_gnp1D_os_01				2.883	0.973835	77.534
SD_gnp1D_os_02				3.5086	1.62103	87.5903
SD_gnp1D_os_03				3.11401	1.42384	81.4159
SD_gnp1D_ms_01				4.60197	1.86052	87.3606
SD_gnp1D_ms_02				3.17333	1.2701	82.1448
SD_gnp1D_ms_03				2.90523	0.735706	75.2513
os = with serine
ms = without serine
in nmol/10^8 cells			average	Serine	Glycine	Lysine	standard deviation	Serine	Glycine	Lysine
SD_WT_os				3.27883	1.07825	82.5221		0.652748	0.390685	5.98862
SD_WT_ms				5.79069	2.36907	83.6064		0.207402	0.293549	4.28996
SD_gnp1D_os				3.16854	1.33957	82.1801		0.258291	0.270854	4.14087
SD_gnp1D_ms				3.56018	1.28878	81.5856		0.744746	0.459392	4.95938
